# Supplementary material for: Effect of the 4′-substituted phenylalanine moiety of sansalvamide A peptide on antitumor activity
Source: Royal Society of Chemistry journal article supplement (doi:10.1039/c3md00294b), 2014-01-01
Supplement: c3md00294b_2.pdf [file c3md00294b_2.pdf]

```
NAME                2012.10.15
EXPNO               1
PROCNO             1
Date_              20121015
Time_              10.33
INSTRUM            spect
PROBHD             5 mm PABBO BB-
PULPROG            zg30
TD                 32768
SOLVENT            CDC13
NS                  32
DS                  0
SWH                10000.000 Hz
FIDRES             0.305176 Hz
AQ                 1.6384500 sec
RG                 90.5
DW                 50.000    usec
DE                 6.50     usec
TE                 295.7 K
D1                 1.00000000 sec
TD0                1
```

```
===== CHANNEL f1 =====
```

|      |             |      |
|------|-------------|------|
| NUC1 |             | 1H   |
| P1   | 13.00       | usec |
| PL1  | 2.00        | dB   |
| PL1W | 16.79986763 | W    |
| SFO1 | 500.1335009 | MHz  |
| SI   | 32768       |      |
| SF   | 500.1300125 | MHz  |
| WDW  |             | EM   |
| SSB  |             | 0    |
| LB   | 0.30        | Hz   |
| GB   |             | 0    |
| PC   | 1.00        |      |

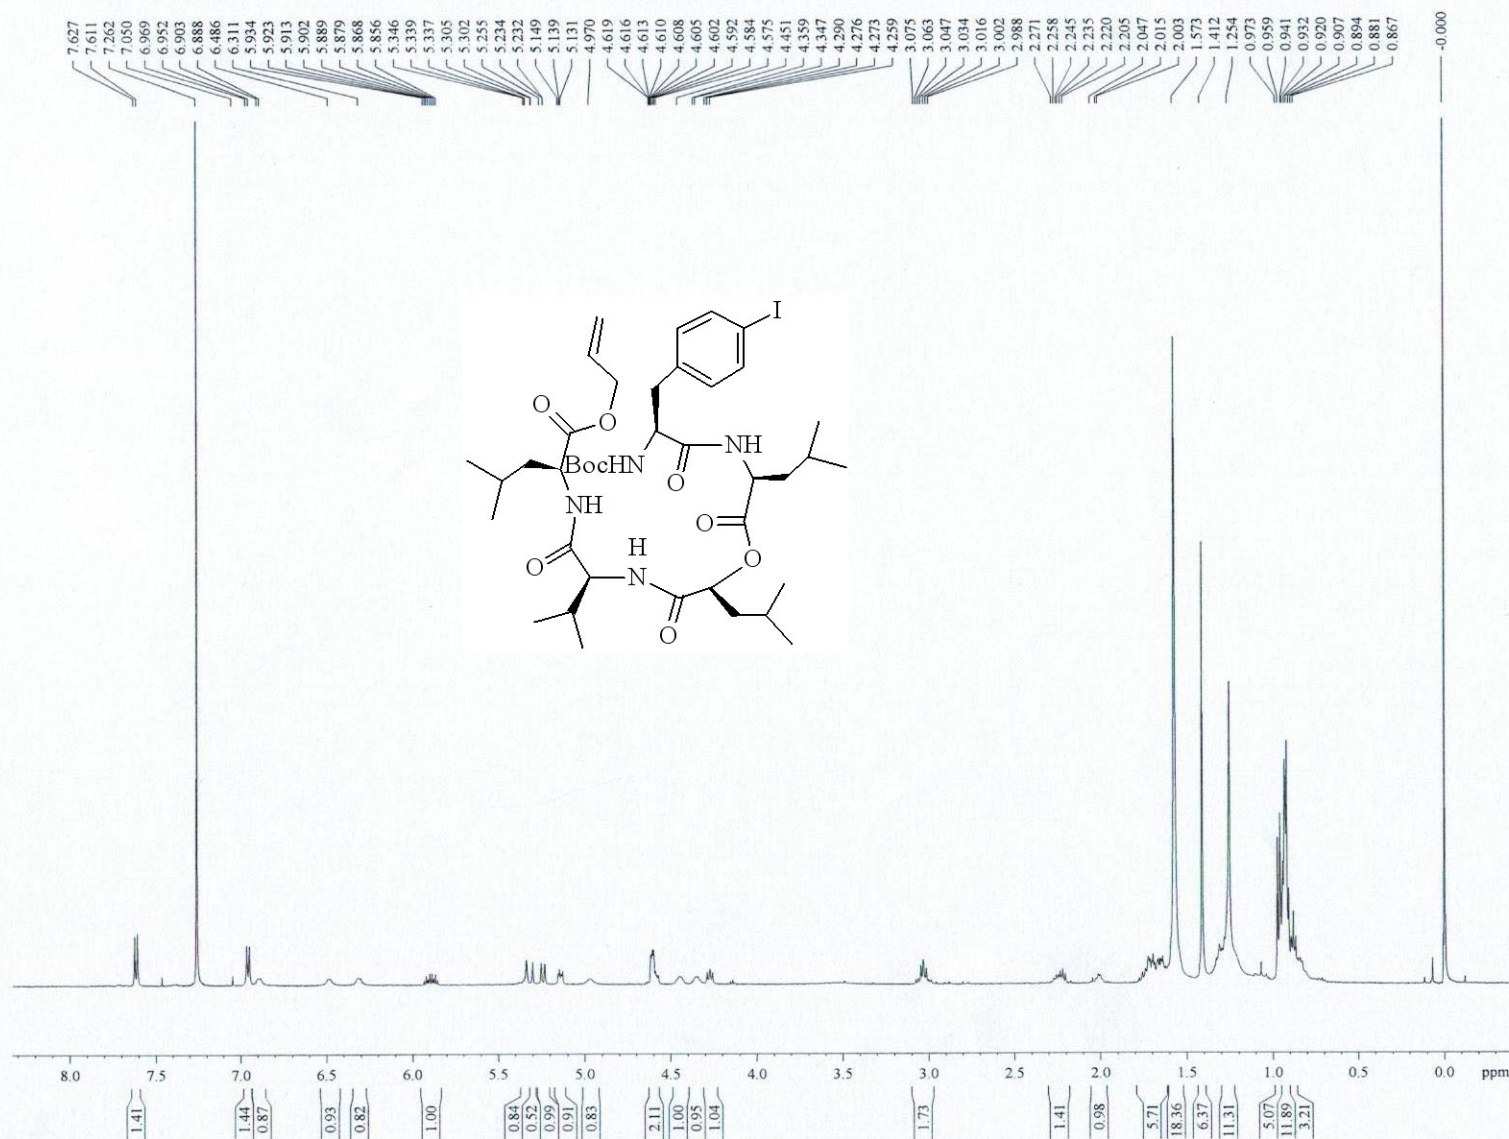



liushouxin--zhb-lianwutai

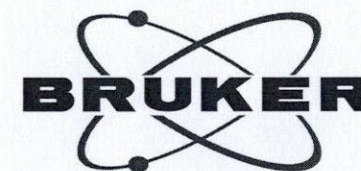

NAME 2013.03.23  
EXPNO 12  
PROCNO 1  
Date\_ 20130323  
Time 15.29  
INSTRUM spect  
PROBHD 5 mm PABBO BB-  
PULPROG zg30  
TD 32768  
SOLVENT DMSO  
NS 8  
DS 0  
SWH 7500.000 Hz  
FIDRES 0.228882 Hz  
AQ 2.1845834 sec  
RG 80.6  
DW 66.667 usec  
DE 6.50 usec  
TE 298.0 K  
D1 1.00000000 sec  
TD0 1

===== CHANNEL f1 =====  
NUC1 1H  
P1 13.00 usec  
PL1 2.00 dB  
PL1W 16.79986763 W  
SFO1 500.1330885 MHz  
SI 32768  
SF 500.1300019 MHz  
WDW EM  
SSB 0  
LB 0.30 Hz  
GB 0  
PC 1.00

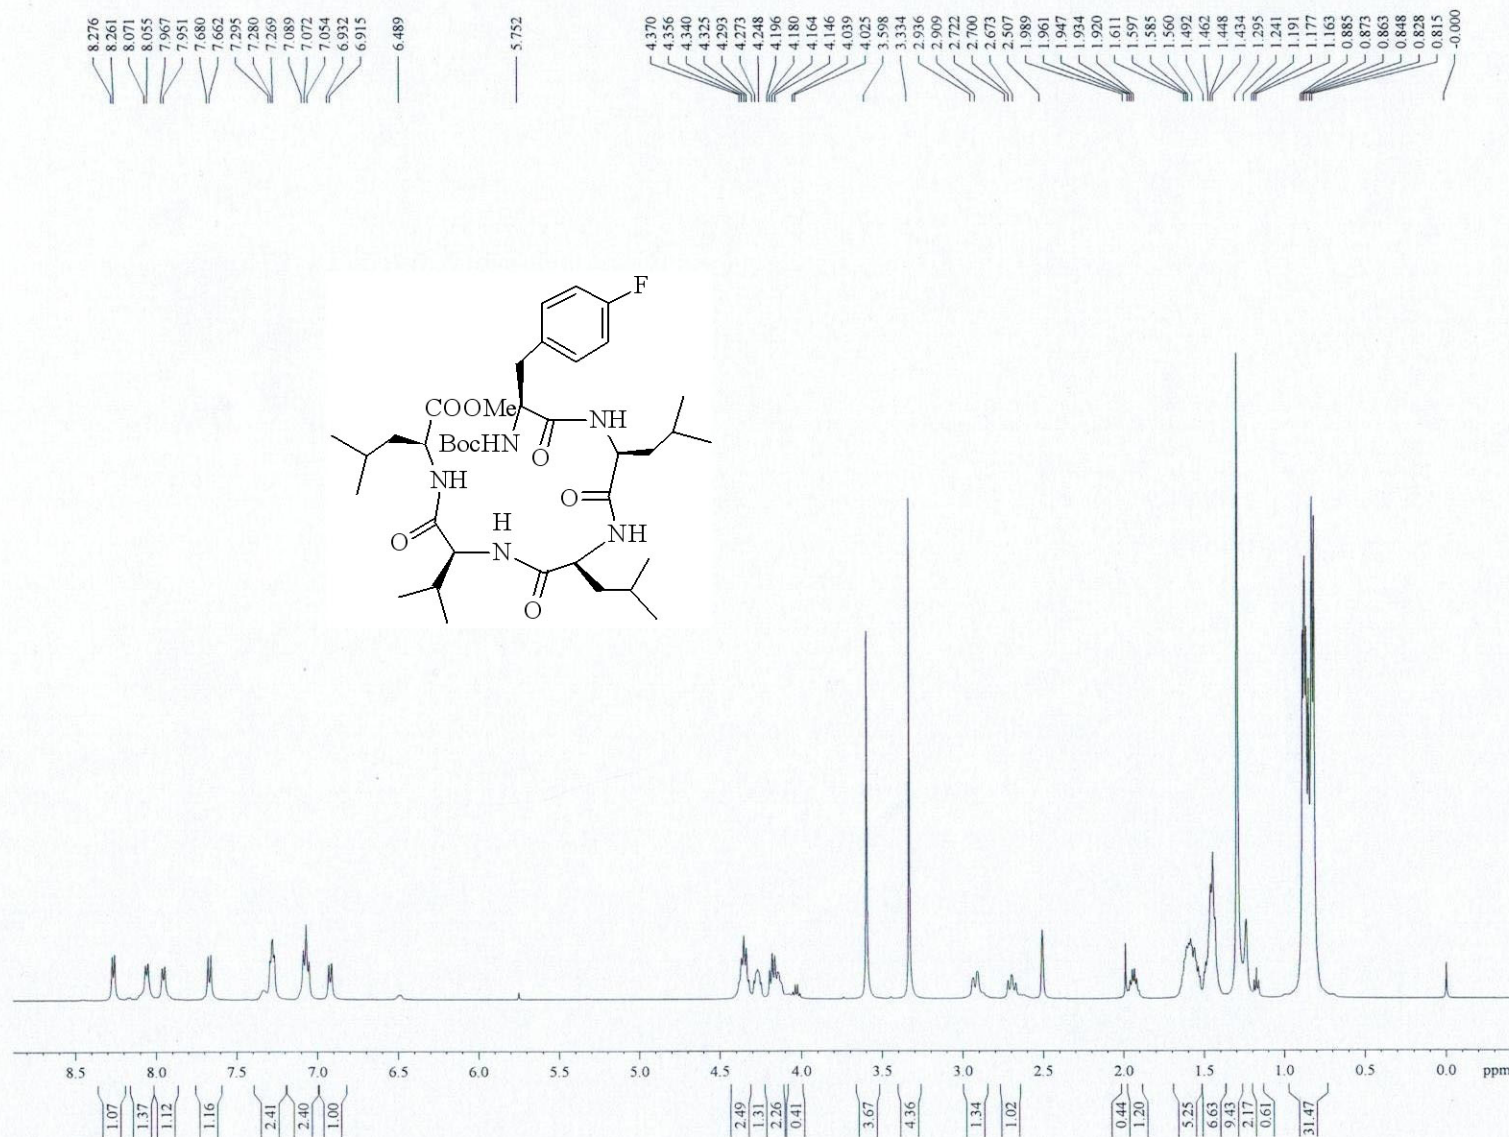



liushouxin-zhb-lianwutai

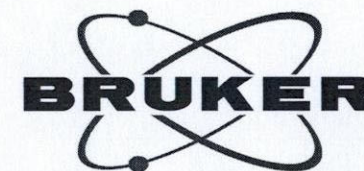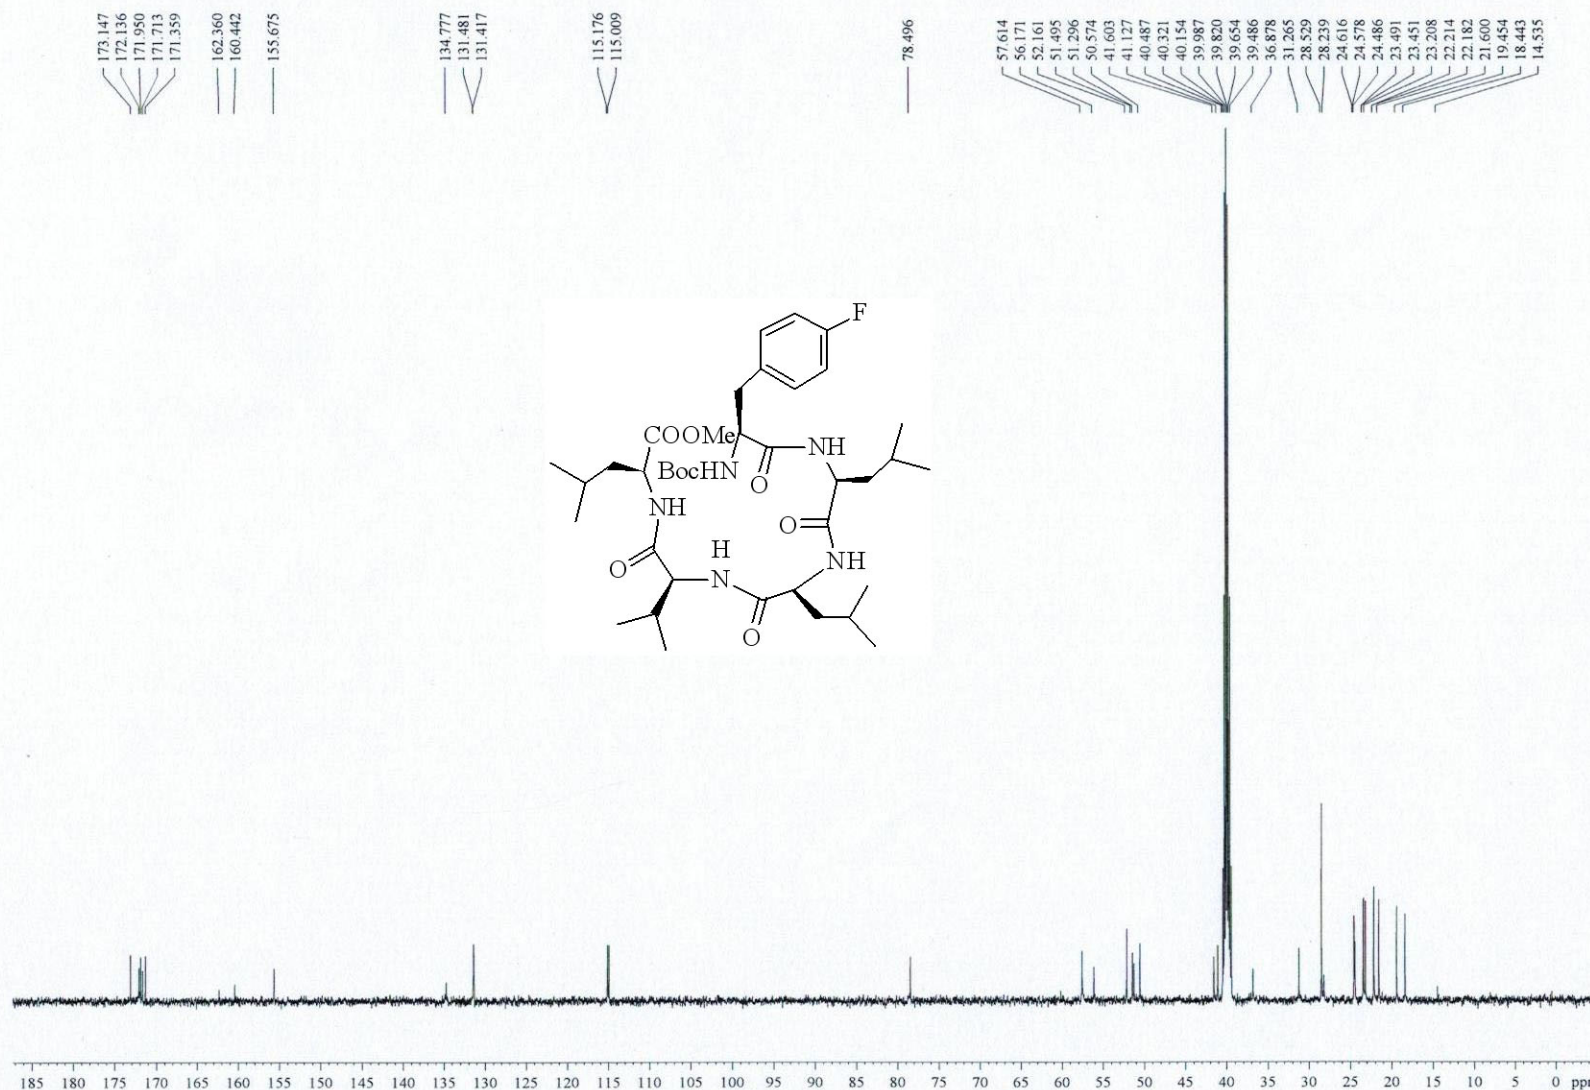

NAME 2013.03.23  
EXPNO 13  
PROCNO 1  
Date 20130323  
Time 15.35  
INSTRUM spect  
PROBHD 5 mm PABBO BB-  
PULPROG zgpg30  
TD 16384  
SOLVENT DMSO  
NS 184  
DS 0  
SWH 29761.904 Hz  
FIDRES 1.816522 Hz  
AQ 0.2753012 sec  
RG 2050  
DW 16.800 usec  
DE 6.50 usec  
TE 298.2 K  
D1 2.00000000 sec  
D11 0.03000000 sec  
TD0 1

===== CHANNEL f1 =====  
NUC1 13C  
P1 12.30 usec  
PL1 4.50 dB  
PL1W 33.60015869 W  
SFO1 125.7703643 MHz

===== CHANNEL f2 =====  
CPDPRG2 waltz16  
NUC2 1H  
PCPD2 80.00 usec  
PL2 2.00 dB  
PL12 17.78 dB  
PL13 17.78 dB  
PL2W 16.79986763 W  
PL12W 0.44392112 W  
PL13W 0.44392112 W  
SFO2 500.1320005 MHz  
SI 32768  
SF 125.7577890 MHz  
WDW EM  
SSB 0  
LB 2.00 Hz  
GB 0  
PC 1.40



liushouxin--zhb-p-cl-huanwutai

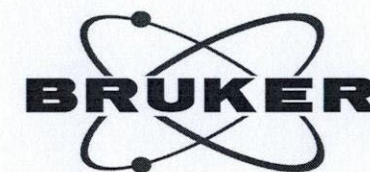

NAME 2013.03.23  
EXPNO 10  
PROCNO 1  
Date\_ 20130323  
Time 15.12  
INSTRUM spect  
PROBHD 5 mm PABBO BB-  
PULPROG zg30  
TD 32768  
SOLVENT DMSO  
NS 8  
DS 0  
SWH 7500.000 Hz  
FIDRES 0.228882 Hz  
AQ 2.1845834 sec  
RG 80.6  
DW 66.667 usec  
DE 6.50 usec  
TE 298.0 K  
D1 1.00000000 sec  
TD0 1

===== CHANNEL f1 =====  
NUC1 1H  
P1 13.00 usec  
PL1 2.00 dB  
PL1W 16.79986763 W  
SFO1 500.1330885 MHz  
SI 32768  
SF 500.1300022 MHz  
WDW EM  
SSB 0  
LB 0.30 Hz  
GB 0  
PC 1.00

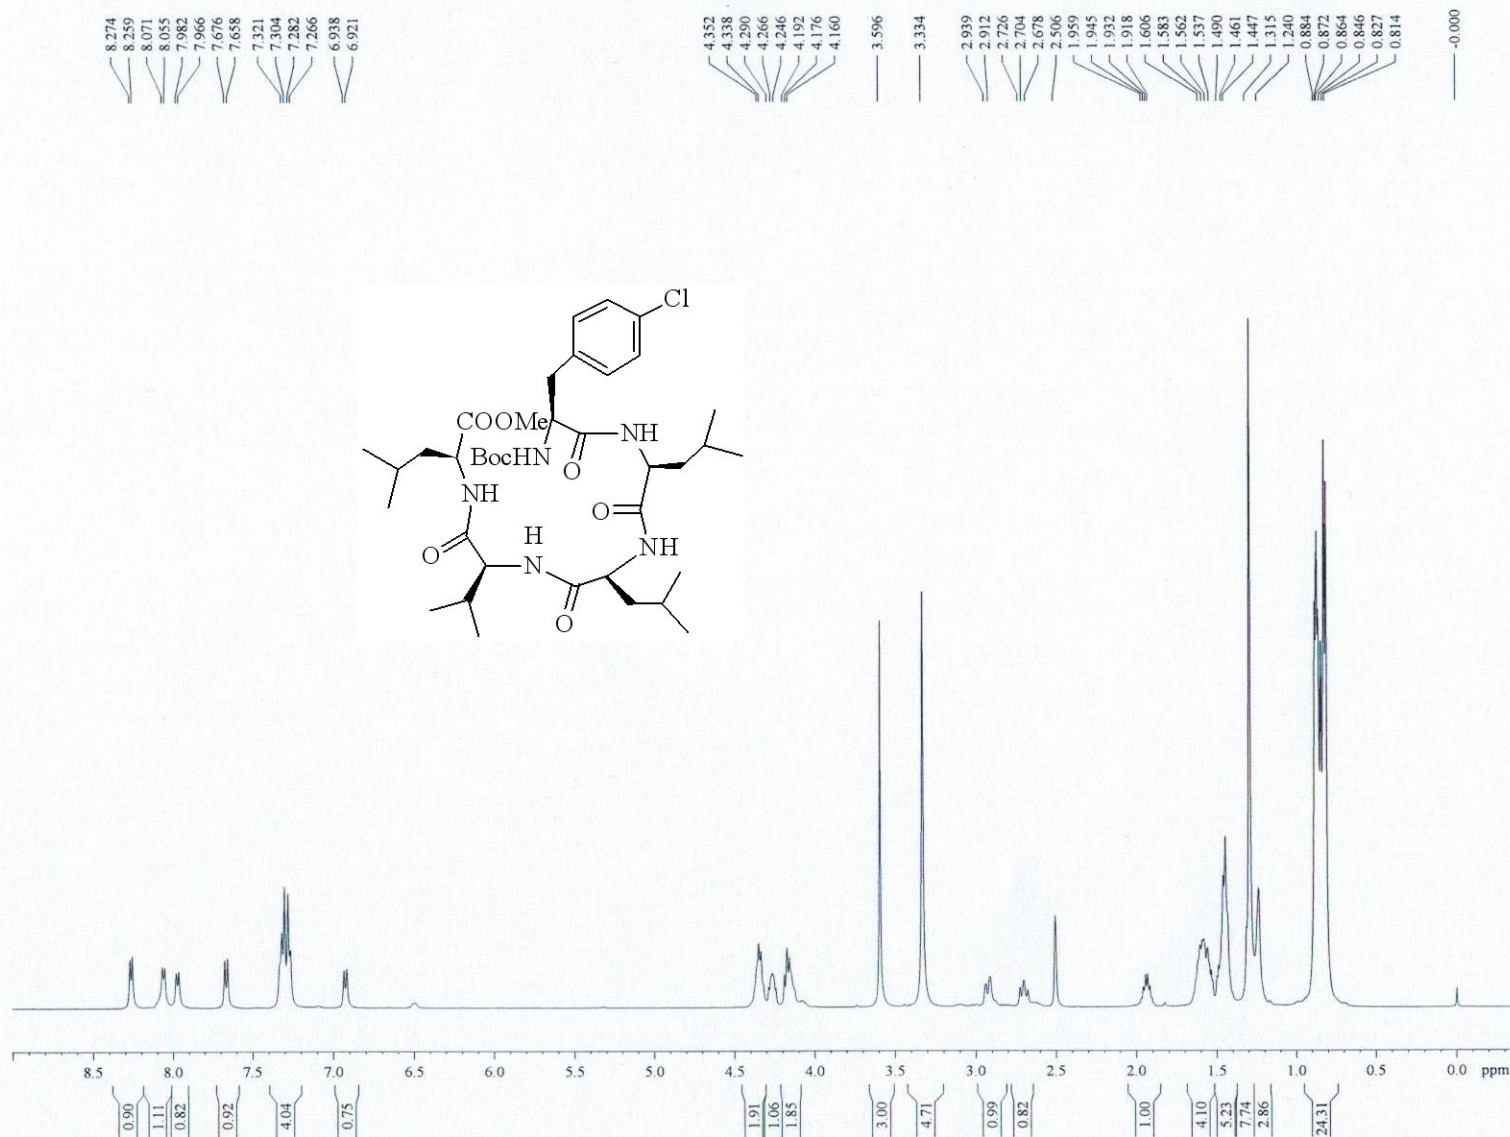



liushouxin-zhb-p-cl-huanwutai

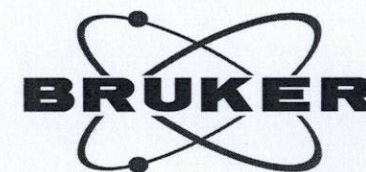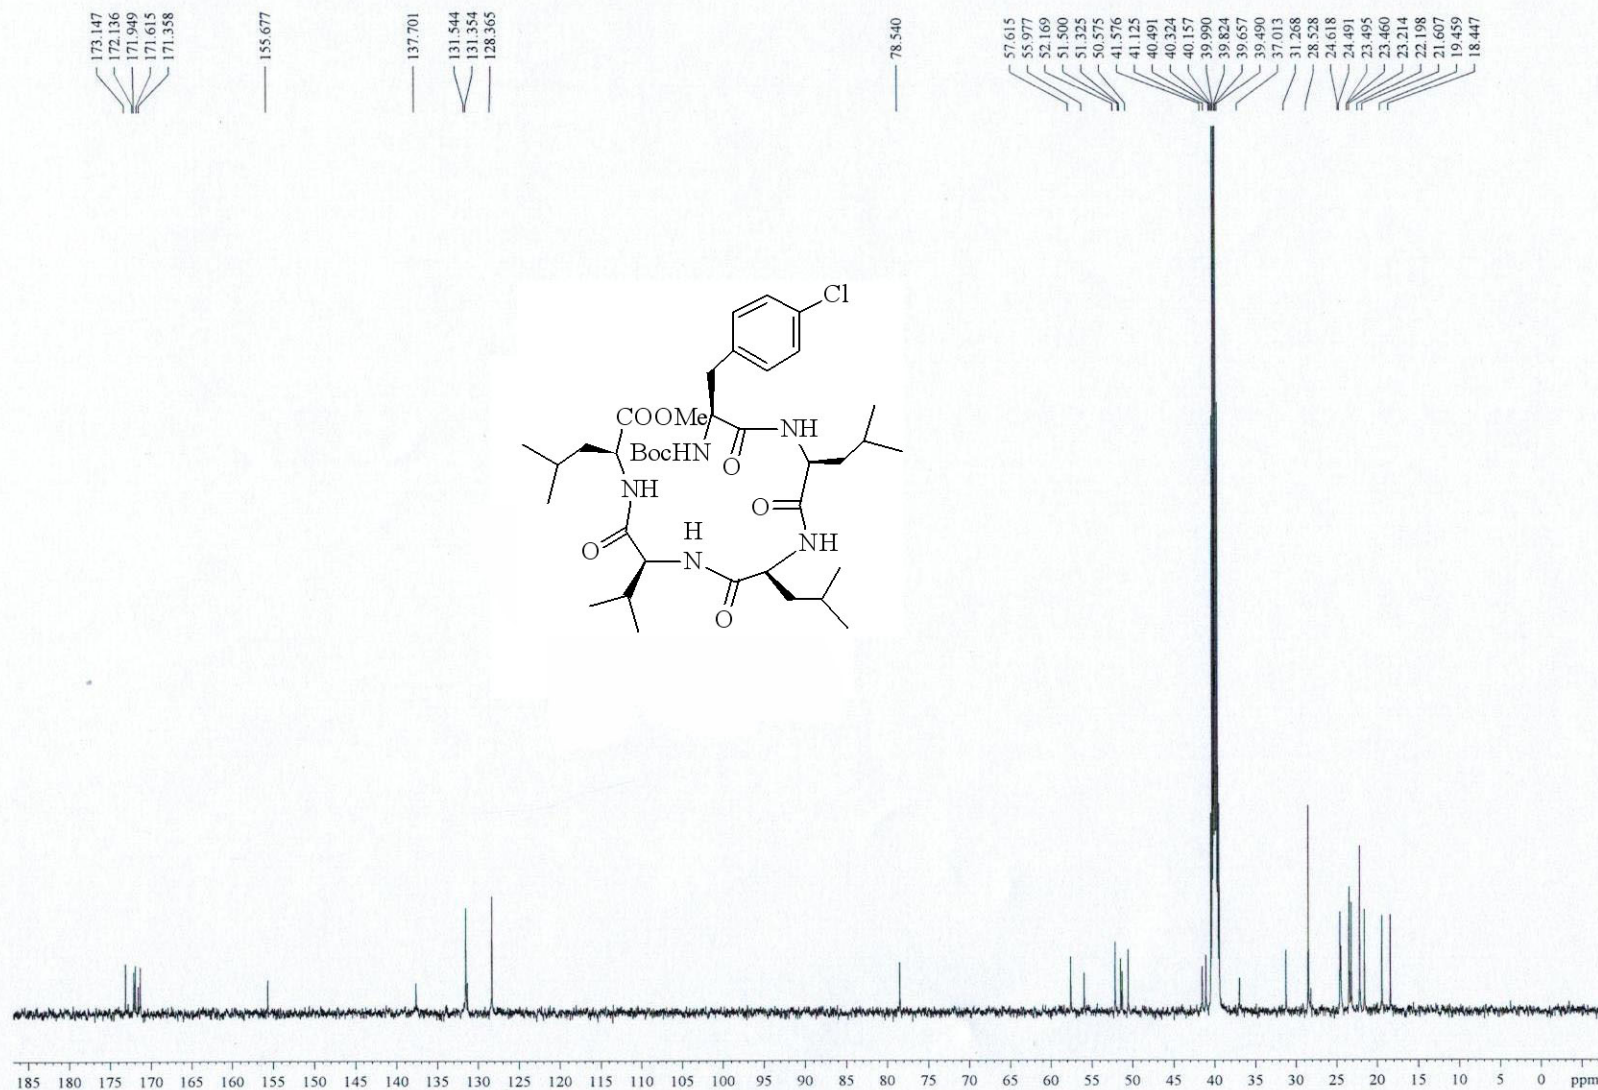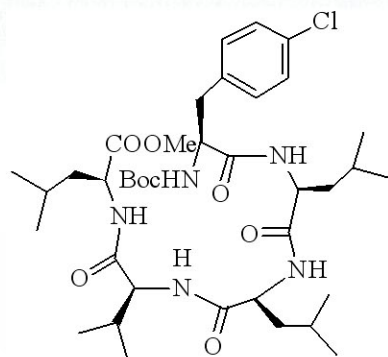

NAME 2013.03.23  
EXPNO 11  
PROCNO 1  
Date\_ 20130323  
Time\_ 15.18  
INSTRUM spect  
PROBHD 5 mm PABBO BB-  
PULPROG zgpg30  
TD 16384  
SOLVENT DMSO  
NS 218  
DS 0  
SWH 29761.904 Hz  
FIDRES 1.816522 Hz  
AQ 0.2753012 sec  
RG 2050  
DW 16.800 usec  
DE 6.50 usec  
TE 298.1 K  
D1 2.00000000 sec  
D11 0.03000000 sec  
TD0 1

===== CHANNEL f1 =====  
NUC1 13C  
P1 12.30 usec  
PL1 4.50 dB  
PL1W 33.60015869 W  
SFO1 125.7703643 MHz

===== CHANNEL f2 =====  
CPDPRG2 waltz16  
NUC2 1H  
PCPD2 80.00 usec  
PL2 2.00 dB  
PL12 17.78 dB  
PL13 17.78 dB  
PL2W 16.79986763 W  
PL12W 0.44392112 W  
PL13W 0.44392112 W  
SFO2 500.1320005 MHz  
SI 32768  
SF 125.7577890 MHz  
WDW EM  
SSB 0  
LB 3.00 Hz  
GB 0  
PC 1.40

liu shou xin LIU

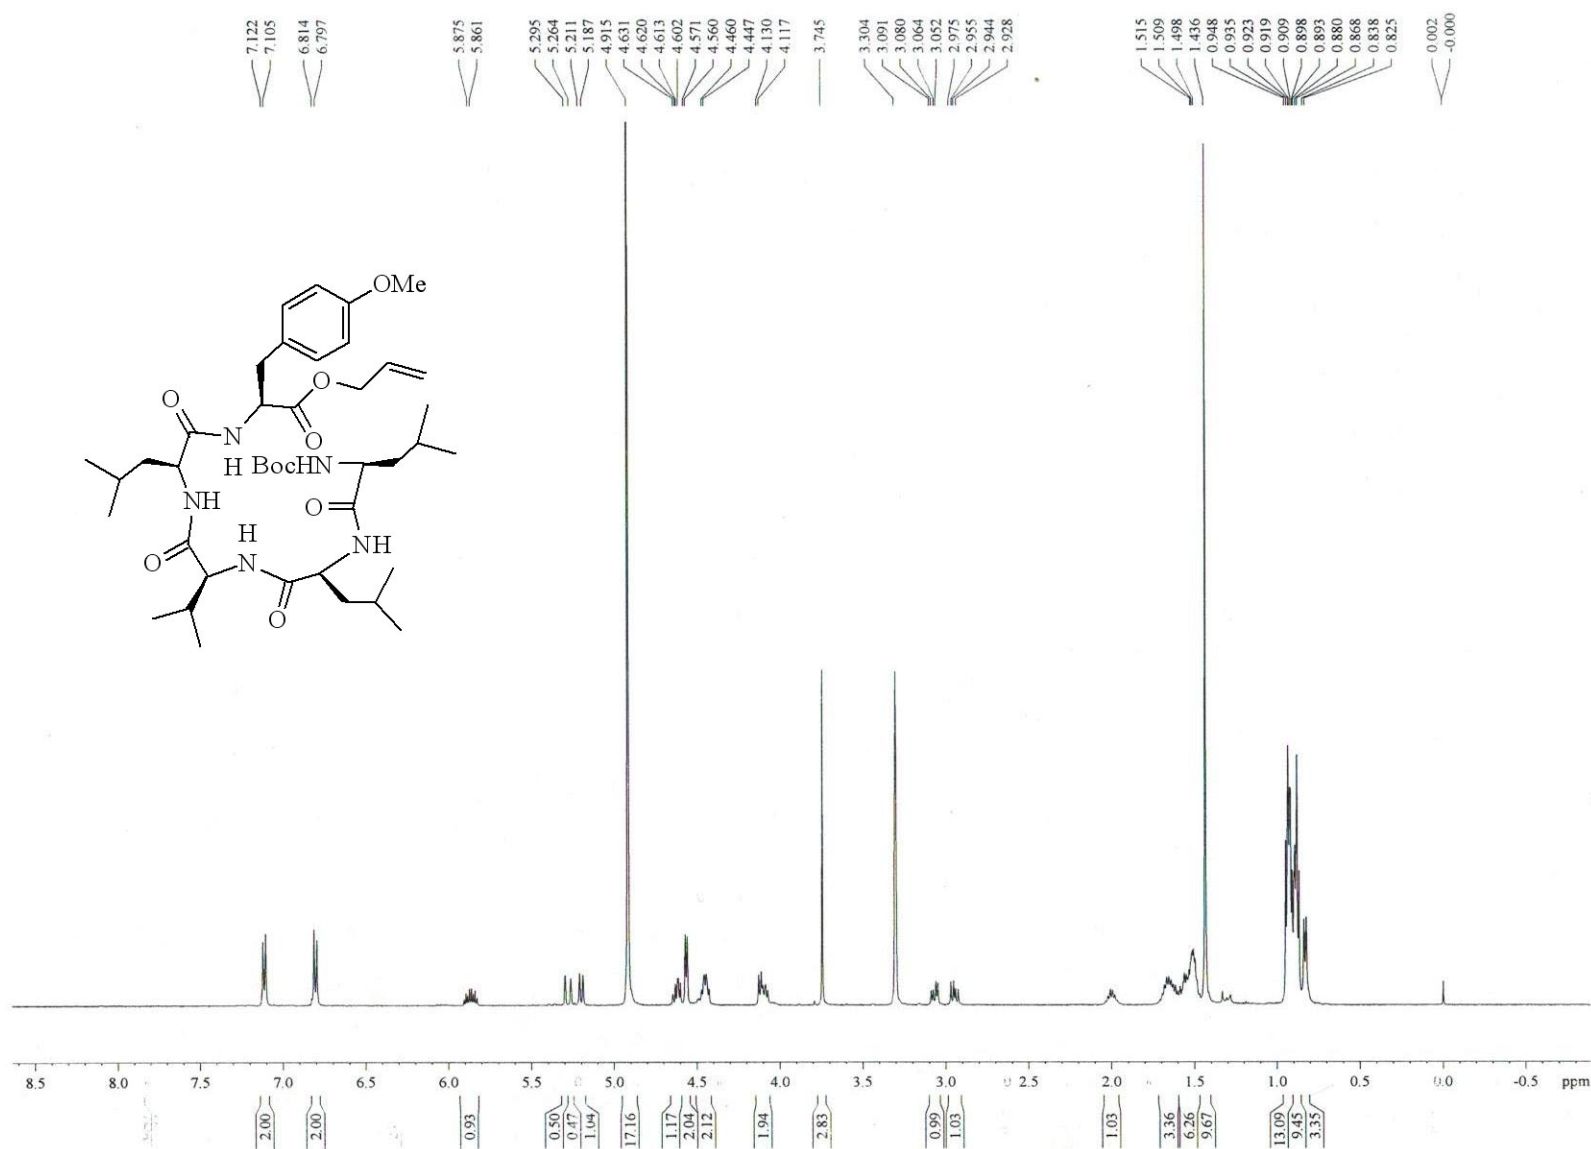

NAME 2012.03.23  
EXPNO 7  
PROCNO 1  
Date\_ 20120323  
Time 14.30  
INSTRUM spect  
PROBHD 5 mm PABBO BB-  
PULPROG zg30  
TD 65536  
SOLVENT MeOD  
NS 1  
DS 2  
SWH 10000.000 Hz  
FIDRES 0.152588 Hz  
AQ 3.2768500 sec  
RG 181  
DW 50.000 usec  
DE 6.50 usec  
TE 290.8 K  
D1 1.00000000 sec  
TD0 1

===== CHANNEL f1 =====  
NUC1 1H  
P1 13.00 usec  
PL1 2.00 dB  
PL1W 16.79986763 W  
SFO1 500.1340010 MHz  
SI 32768  
SF 500.1300137 MHz  
WDW EM  
SSB 0  
LB 0.30 Hz  
GB 0  
PC 1.00

liu shou xin LIU

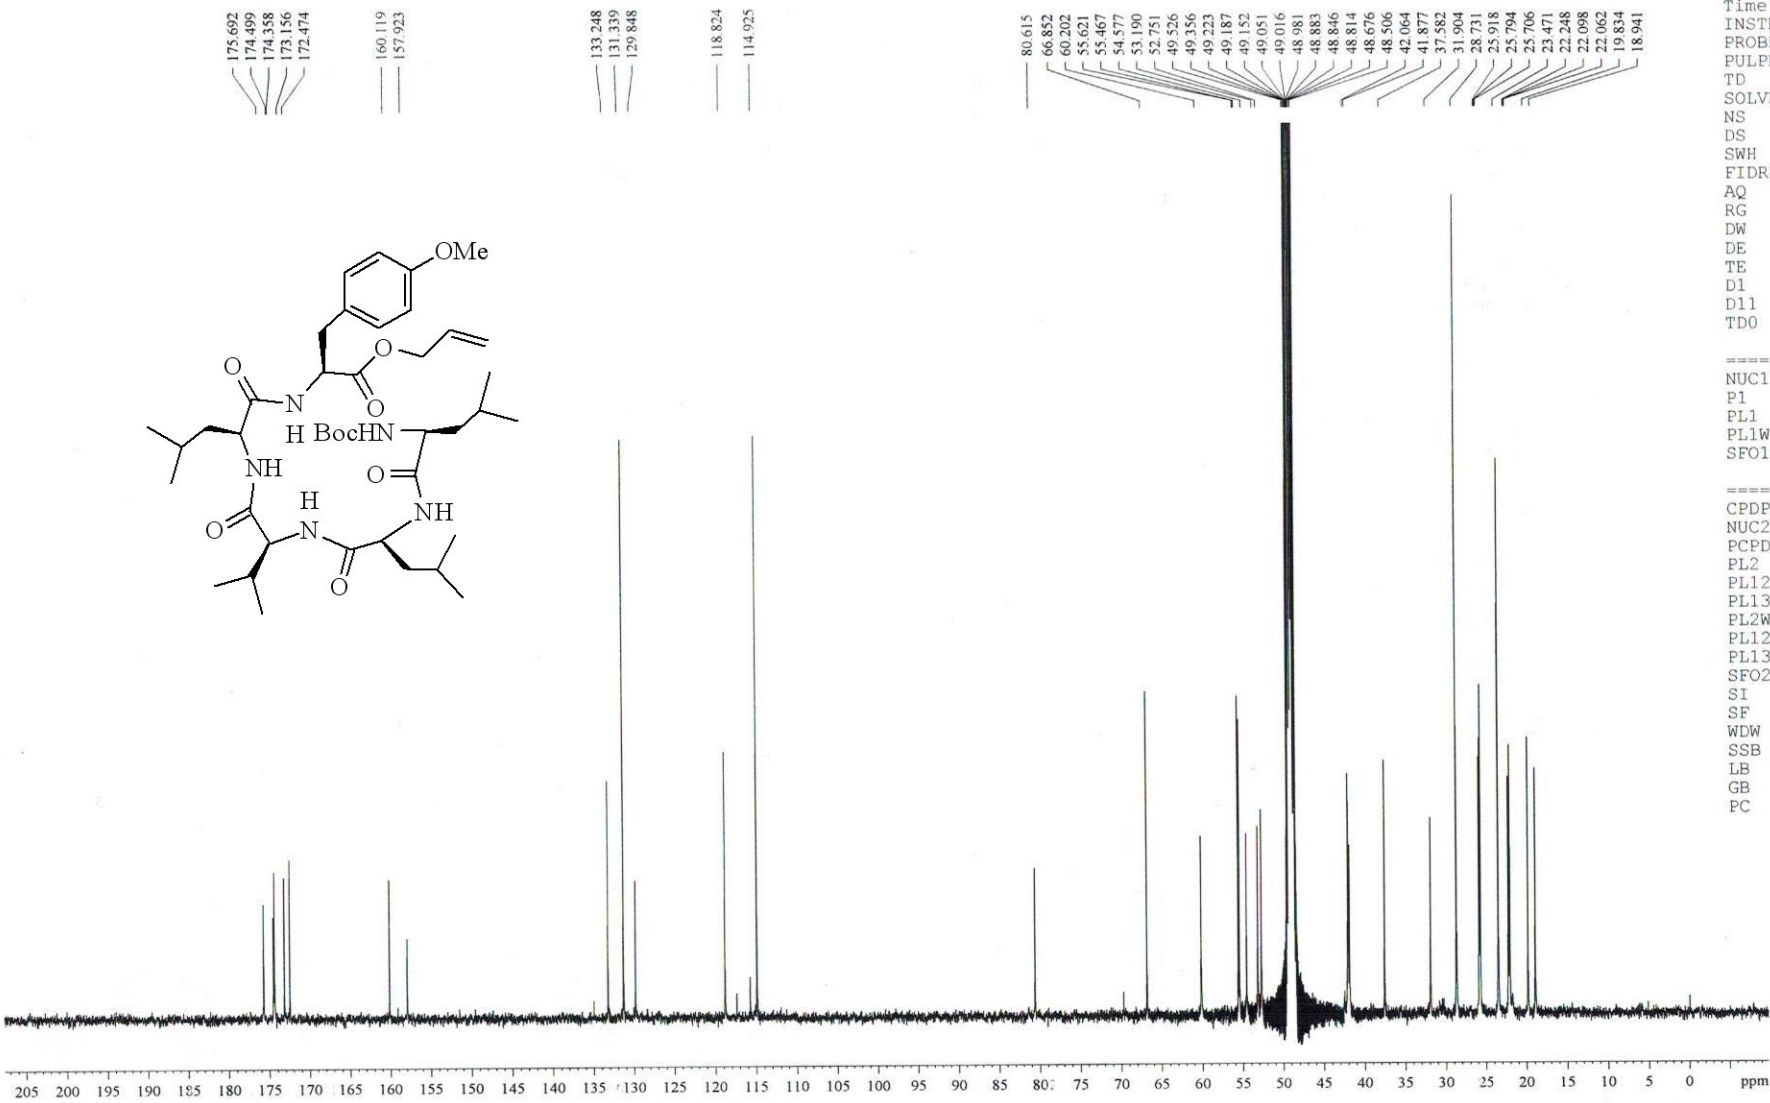

NAME 2012.03.27  
EXPNO 9  
PROCNO 1  
Date\_ 20120327  
Time\_ 17.06  
INSTRUM spect  
PROBHD 5 mm PABBO BB-  
PULPROG zgpg30  
TD 16384  
SOLVENT MeOD  
NS 24106  
DS 0  
SWH 29761.904 Hz  
FIDRES 1.816522 Hz  
AQ 0.2753012 sec  
RG 2050  
DW 16.800 usec  
DE 6.50 usec  
TE 292.8 K  
D1 2.00000000 sec  
D11 0.03000000 sec  
TD0 1

===== CHANNEL f1 =====  
NUC1 13C  
P1 12.30 usec  
PL1 4.50 dB  
PL1W 33.60015869 W  
SFO1 125.7703643 MHz

===== CHANNEL f2 =====  
CPDPRG2 waltz16  
NUC2 1H  
PCPD2 80.00 usec  
PL2 2.00 dB  
PL12 17.78 dB  
PL13 17.78 dB  
PL2W 16.79986763 W  
PL12W 0.44392112 W  
PL13W 0.44392112 W  
SFO2 500.1320005 MHz  
SI 32768  
SF 125.7576104 MHz  
WDW EM  
SSB 0  
LB 2.00 Hz  
GB 0  
PC 1.40
